# Supplementary material for: Fatty acid desaturation and lipoxygenase pathways support trained immunity
Source: PubMed Central journal article supplement (PMC10651900; doi:10.1038/s41467-023-43315-x), 2023-11-15
Supplement: 41467_2023_43315_MOESM1_ESM.pdf [file 41467_2023_43315_MOESM1_ESM.pdf]

## Supplementary Figures

### Fatty acid desaturation and lipoxygenase pathways support trained immunity

Anaísa V. Ferreira<sup>a,b\*\*</sup>, Juan Carlos Alarcon-Barrera<sup>c#</sup>, Jorge Domínguez-Andrés<sup>a</sup>, Ozlem Bulut<sup>a</sup>, Gizem Kilic<sup>a</sup>, Priya A. Debisarun<sup>a</sup>, Rutger J. Röring<sup>a</sup>, Hatice N. Özhan<sup>a</sup>, Eva Terschlüsen<sup>d</sup>, Athanasios Ziogas<sup>a</sup>, Sarantos Kostidis<sup>d</sup>, Yassene Mohammed<sup>c</sup>, Vasiliki Matzaraki<sup>a</sup>, George Renieris<sup>e</sup>, Evangelos J Giamarellos-Bourboulis<sup>e</sup>, Mihai G. Netea<sup>a,f</sup>, Martin Giera<sup>c\*</sup>

<sup>a</sup> Department of Internal Medicine and Radboud Center for Infectious Diseases (RCI), Radboud University Nijmegen Medical Center, 6500HB Nijmegen, The Netherlands

<sup>b</sup> Instituto de Ciências Biomédicas Abel Salazar (ICBAS), Universidade do Porto, 4050-313 Porto, Portugal

<sup>c</sup> Center for Proteomics and Metabolomics, Leiden University Medical Center, 2333ZA Leiden, the Netherlands

<sup>d</sup> Department of Medical Microbiology, Radboud University Medical Centre, 6500HB Nijmegen, The Netherlands

<sup>e</sup> 4th Department of Internal Medicine, National and Kapodistrian University of Athens, Medical School, Athens, Greece.

<sup>f</sup> Department for Immunology and Metabolism, Life and Medical Sciences Institute (LIMES), University of Bonn, 53115 Bonn, Germany

#Equally contributing authors

\*Corresponding authors:

AV Ferreira: [anaisa.validoferreira@radboudumc.nl](mailto:anaisa.validoferreira@radboudumc.nl)

M Giera: [m.a.giera@lumc.nl](mailto:m.a.giera@lumc.nl)

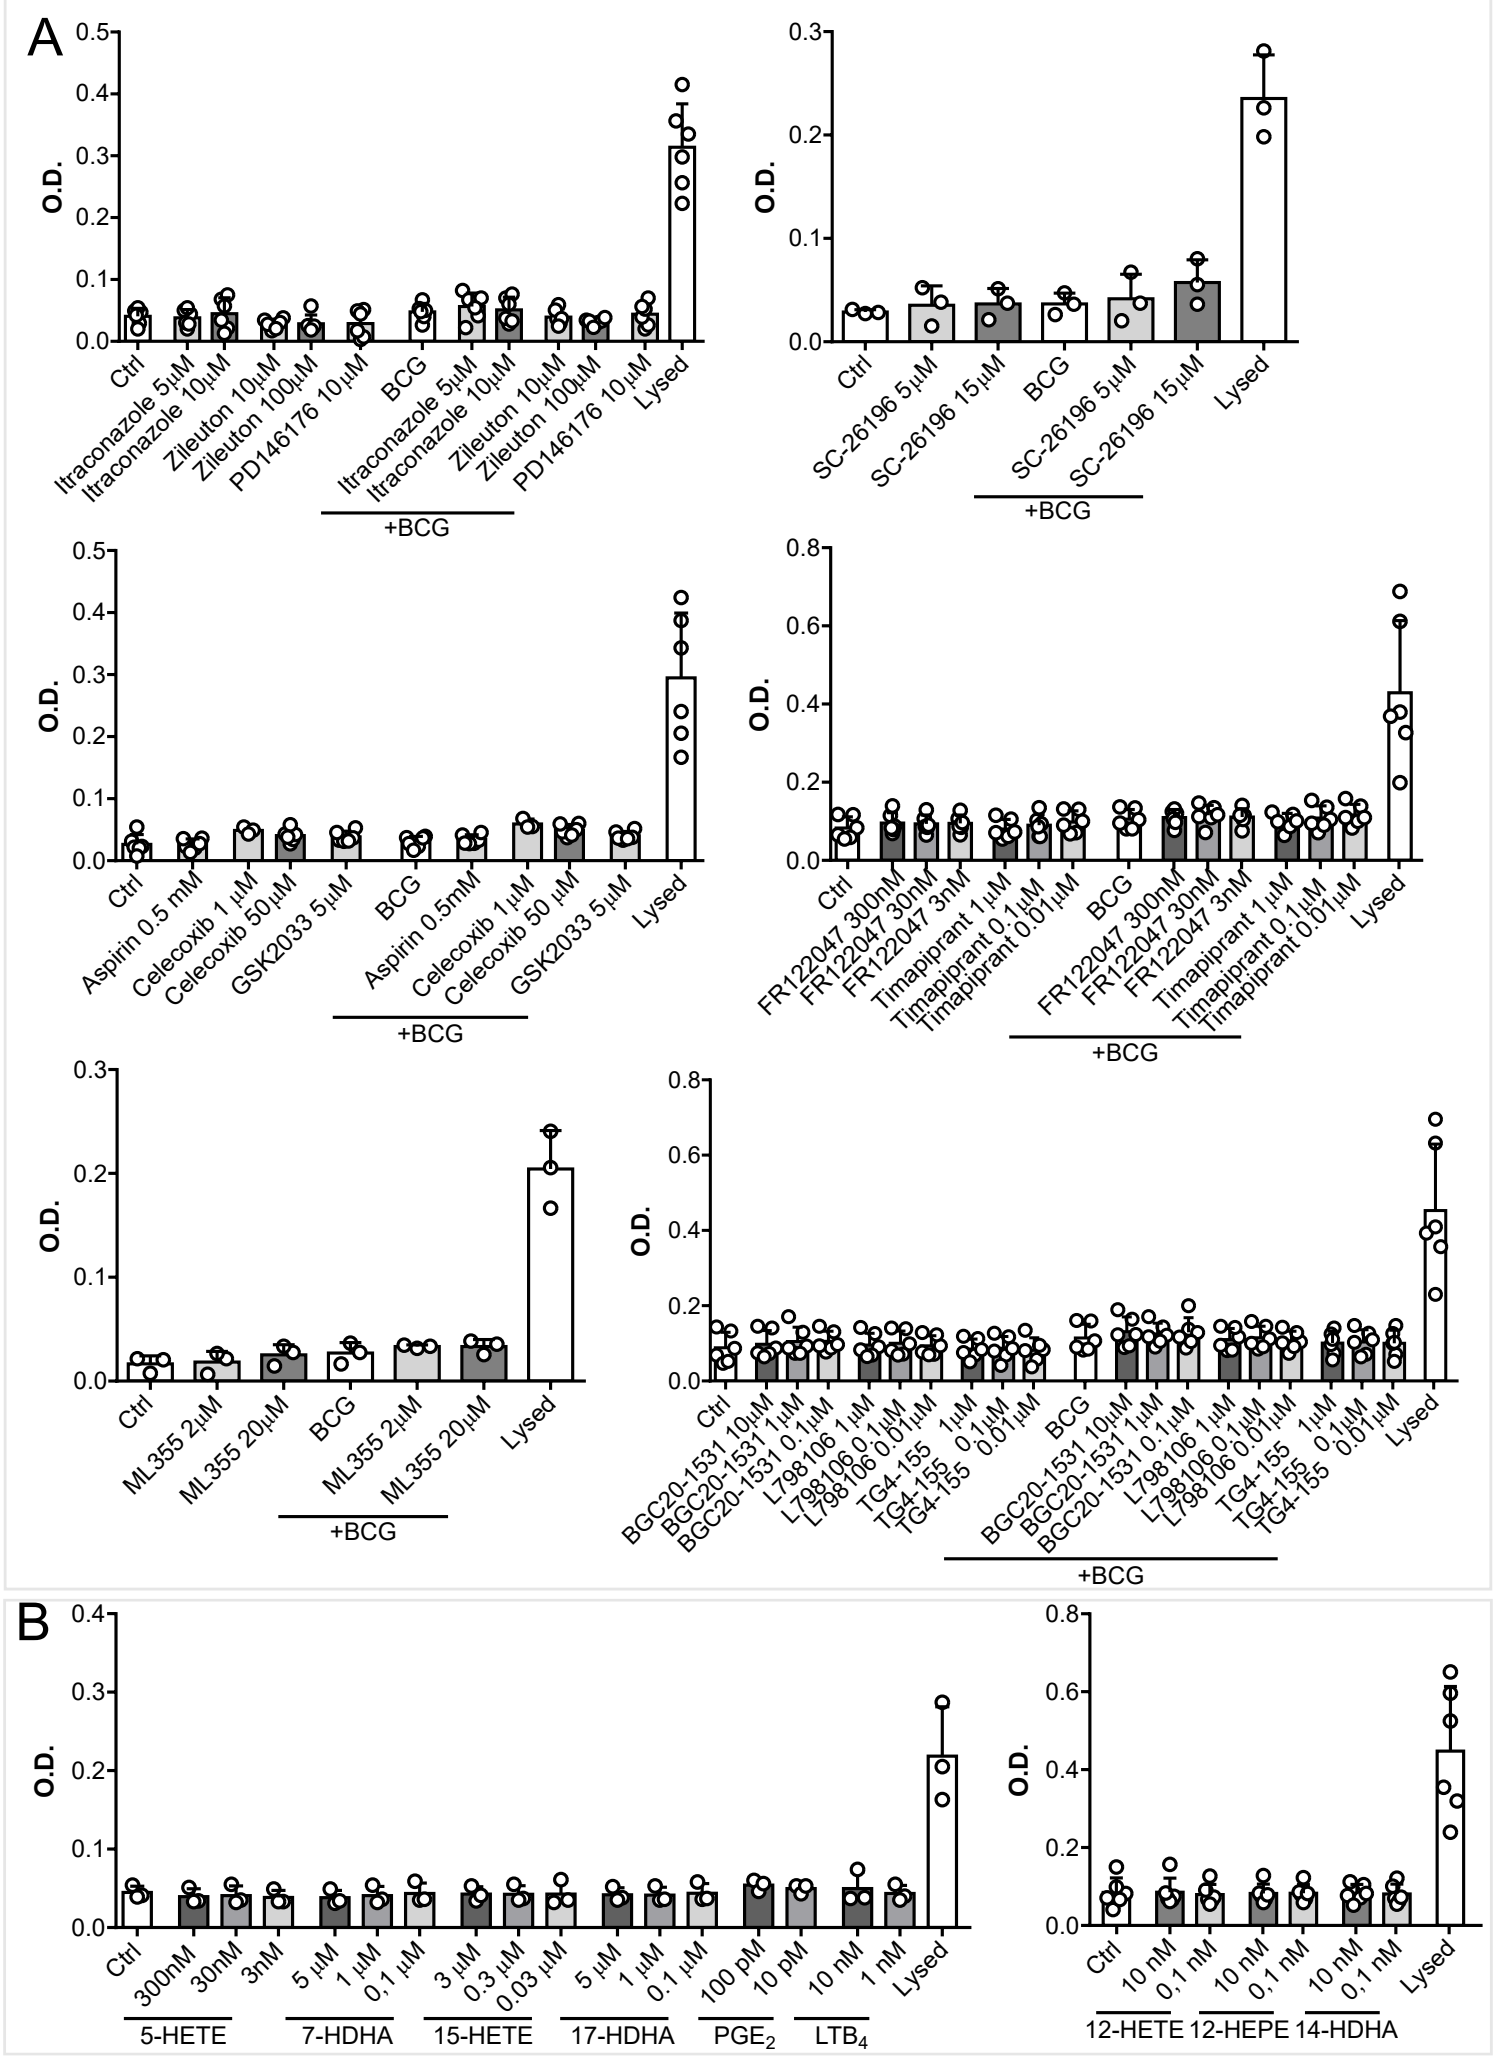

**Figure S1. LDH in the conditioned media of monocytes** incubated for 24h with (A) Itraconazole, Zileuton, PD146178, SC-26196, Aspirin, Celecoxib, GSK2033, FR122047, Timapiprant, ML355, BGC20-1531, L798106, TG4-155 alone or in combination with BCG (n=3/6 biological replicates pooled from 2 independent experiments, Mean+SD) and (B) 5-HETE, 7-HDHA, 15-HETE, 17-HDHA, LTB<sub>4</sub>, PGE<sub>2</sub>, 12-HETE, 12-HEPE, 14-HDHA (n=3/6 biological replicates, pooled from 1/2 independent experiments Mean+SD).

## Omega - 6 fatty acids

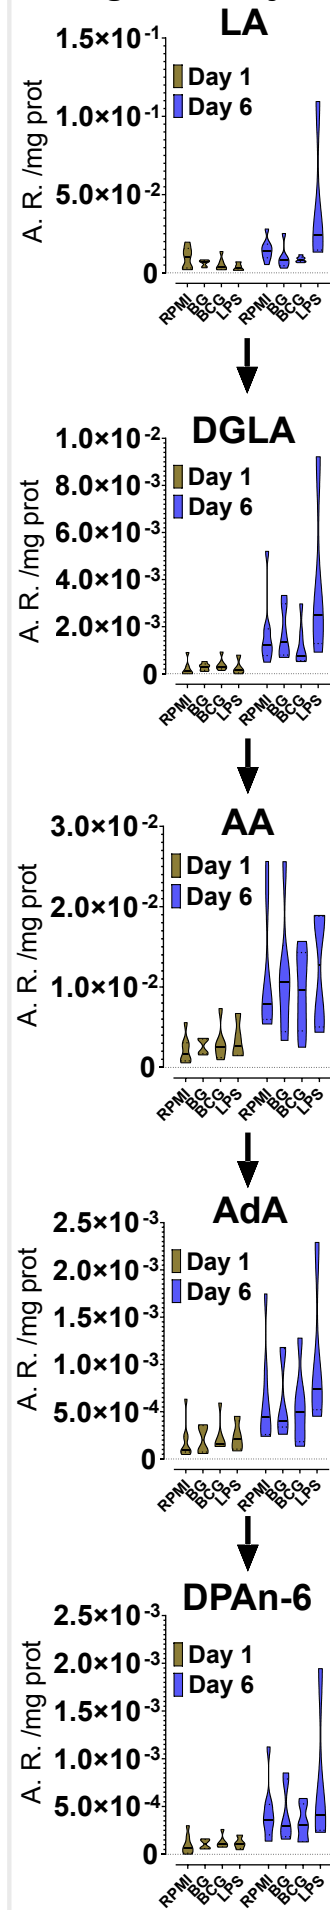

$\Delta$ -6 desaturation  
Elongation

$\Delta$ -5 desaturation

Elongation

Elongation  
 $\Delta$ -6 desaturation  
 $\beta$ -oxidation

## Omega - 3 fatty acids

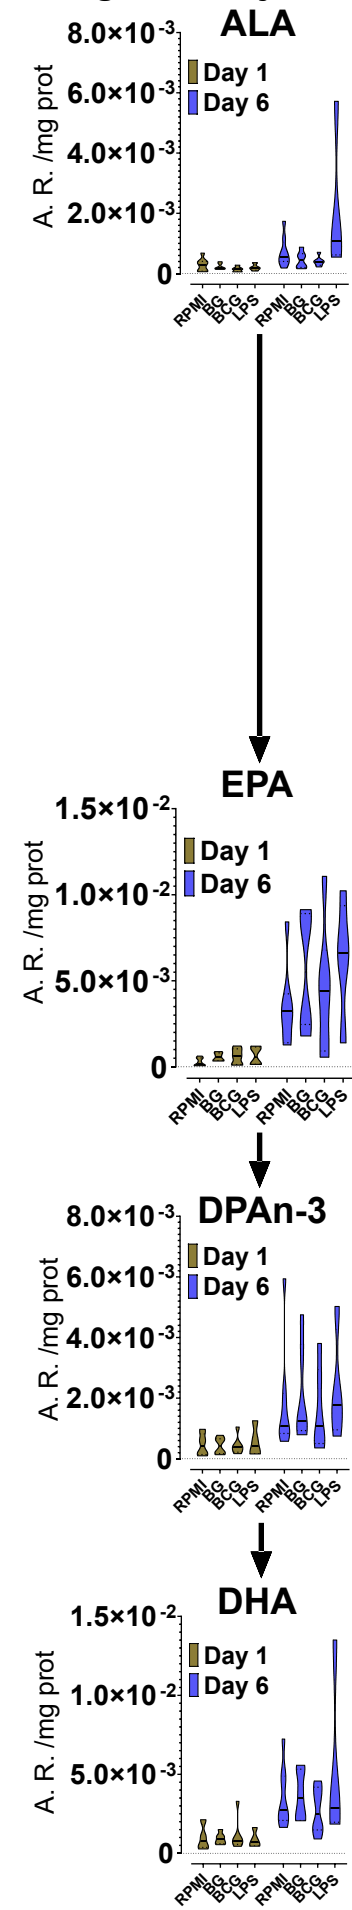

**Figure S2.** Area ratio (A.R) levels of PUFA corrected for internal standards and protein in the omega-6/3 pathways in stimulated monocytes at 24h with BG, BCG, and LPS and after 6 days of culture (n=4-8 biological replicates), Median and the interquartile region.

Monocytes

RPMI/ BG/ BCG/ LPS

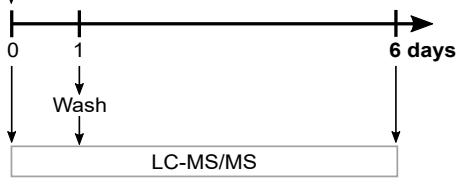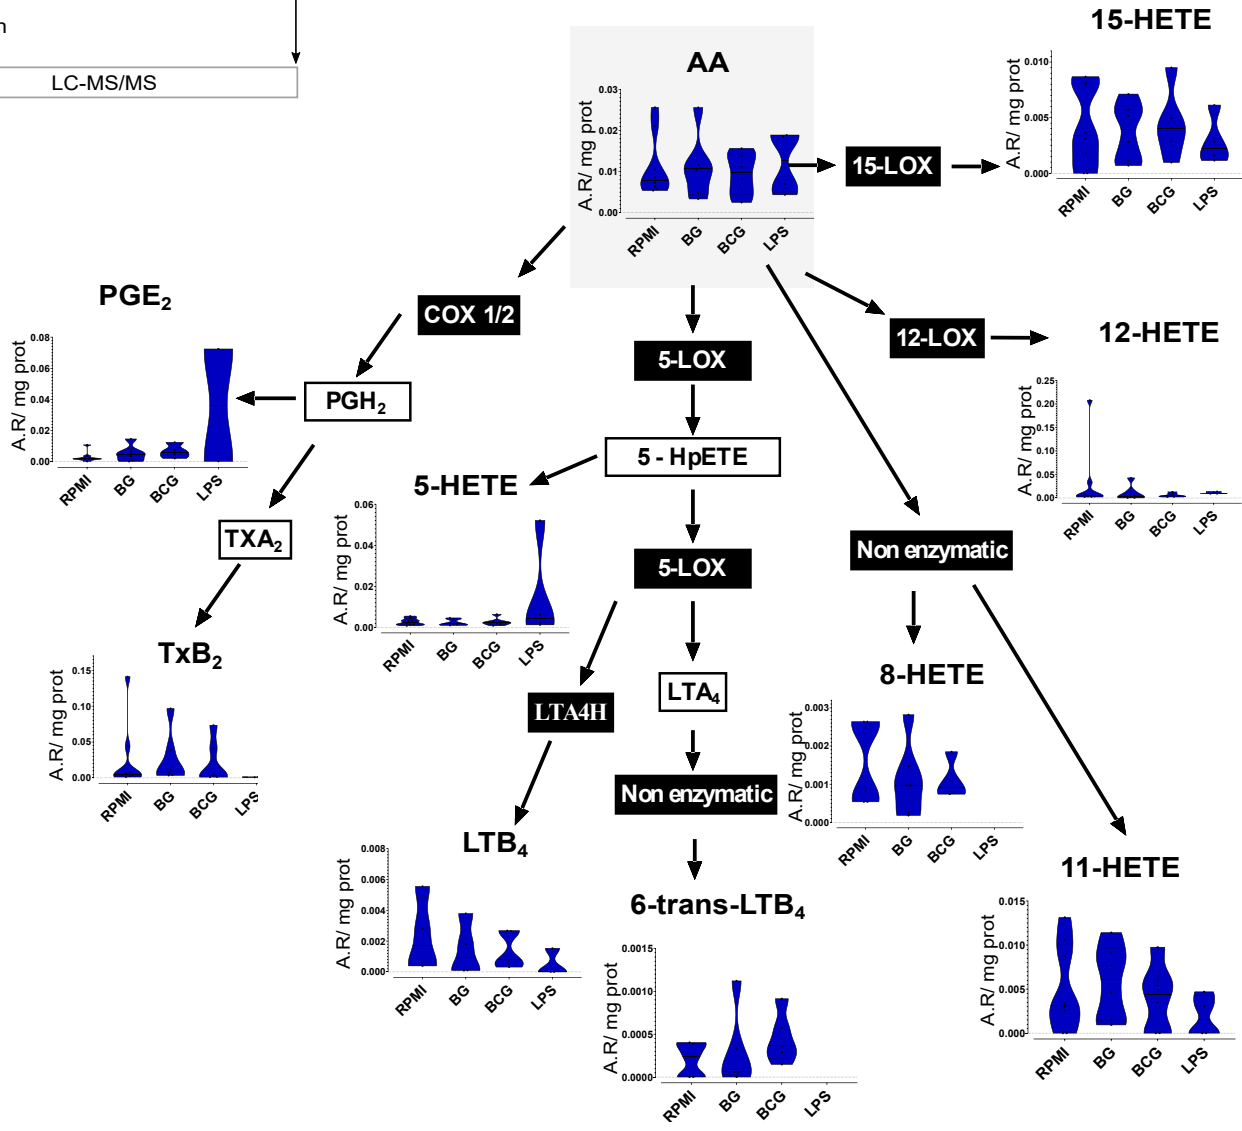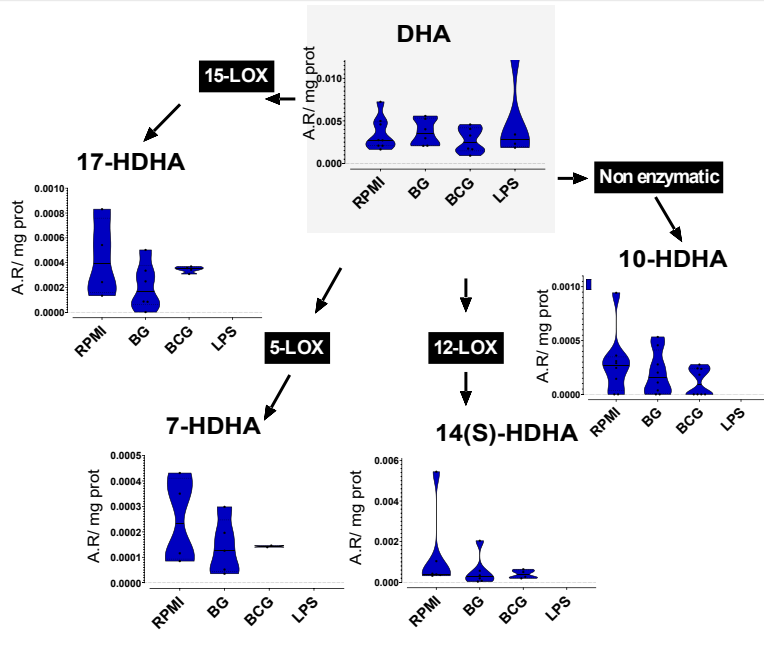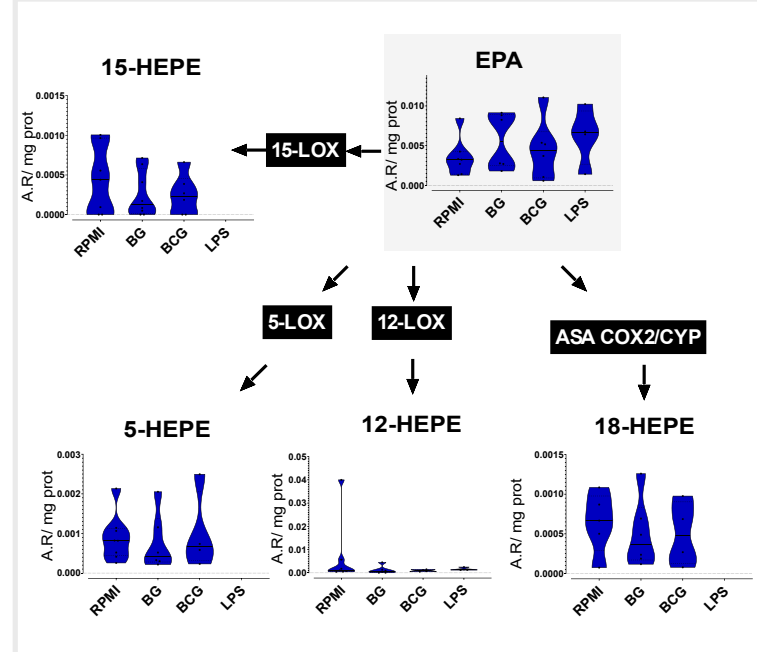

**Figure S3.** Area ratio (A.R) levels corrected to protein levels of PUFA and oxylipids of macrophages at day 6 of culture after in vitro exposure to BG, BCG or LPS (n=4-8 biological replicates), Median and the interquartile region. Data points below the technical limit of detection are not shown.

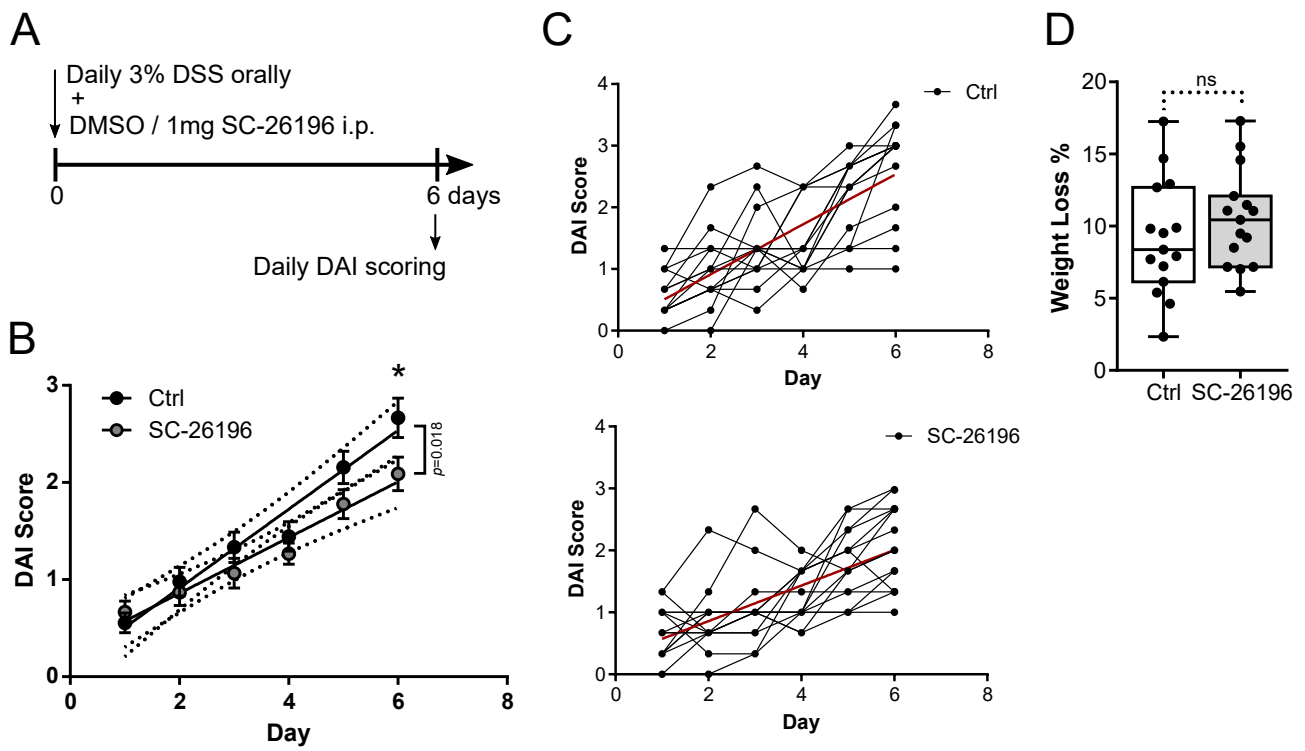

**Figure S4. In vivo DSS-induced colitis DAI score and weight loss.** (A) Schematic representation of the *in vivo* colitis model used. (B) DAI score (stool consistency, rectal bleeding, and weight loss) of mice with DSS-induced colitis and daily administration of 1 mg SC-26196 or vehicle control. (C) DAI score of individual mice in the vehicle control group (top panel) and in the SC-26196 group (bottom panel), linear regression is shown in red. (D) Weight loss of mice at day 6 (n=15 mice per condition pooled from 2 independent experiments), (A) Mean+SD, (D) Mean, 10-90 percentile and whiskers extend to the most extreme points. Mann-Whitney U test and linear regression analysis. ns: non-significant

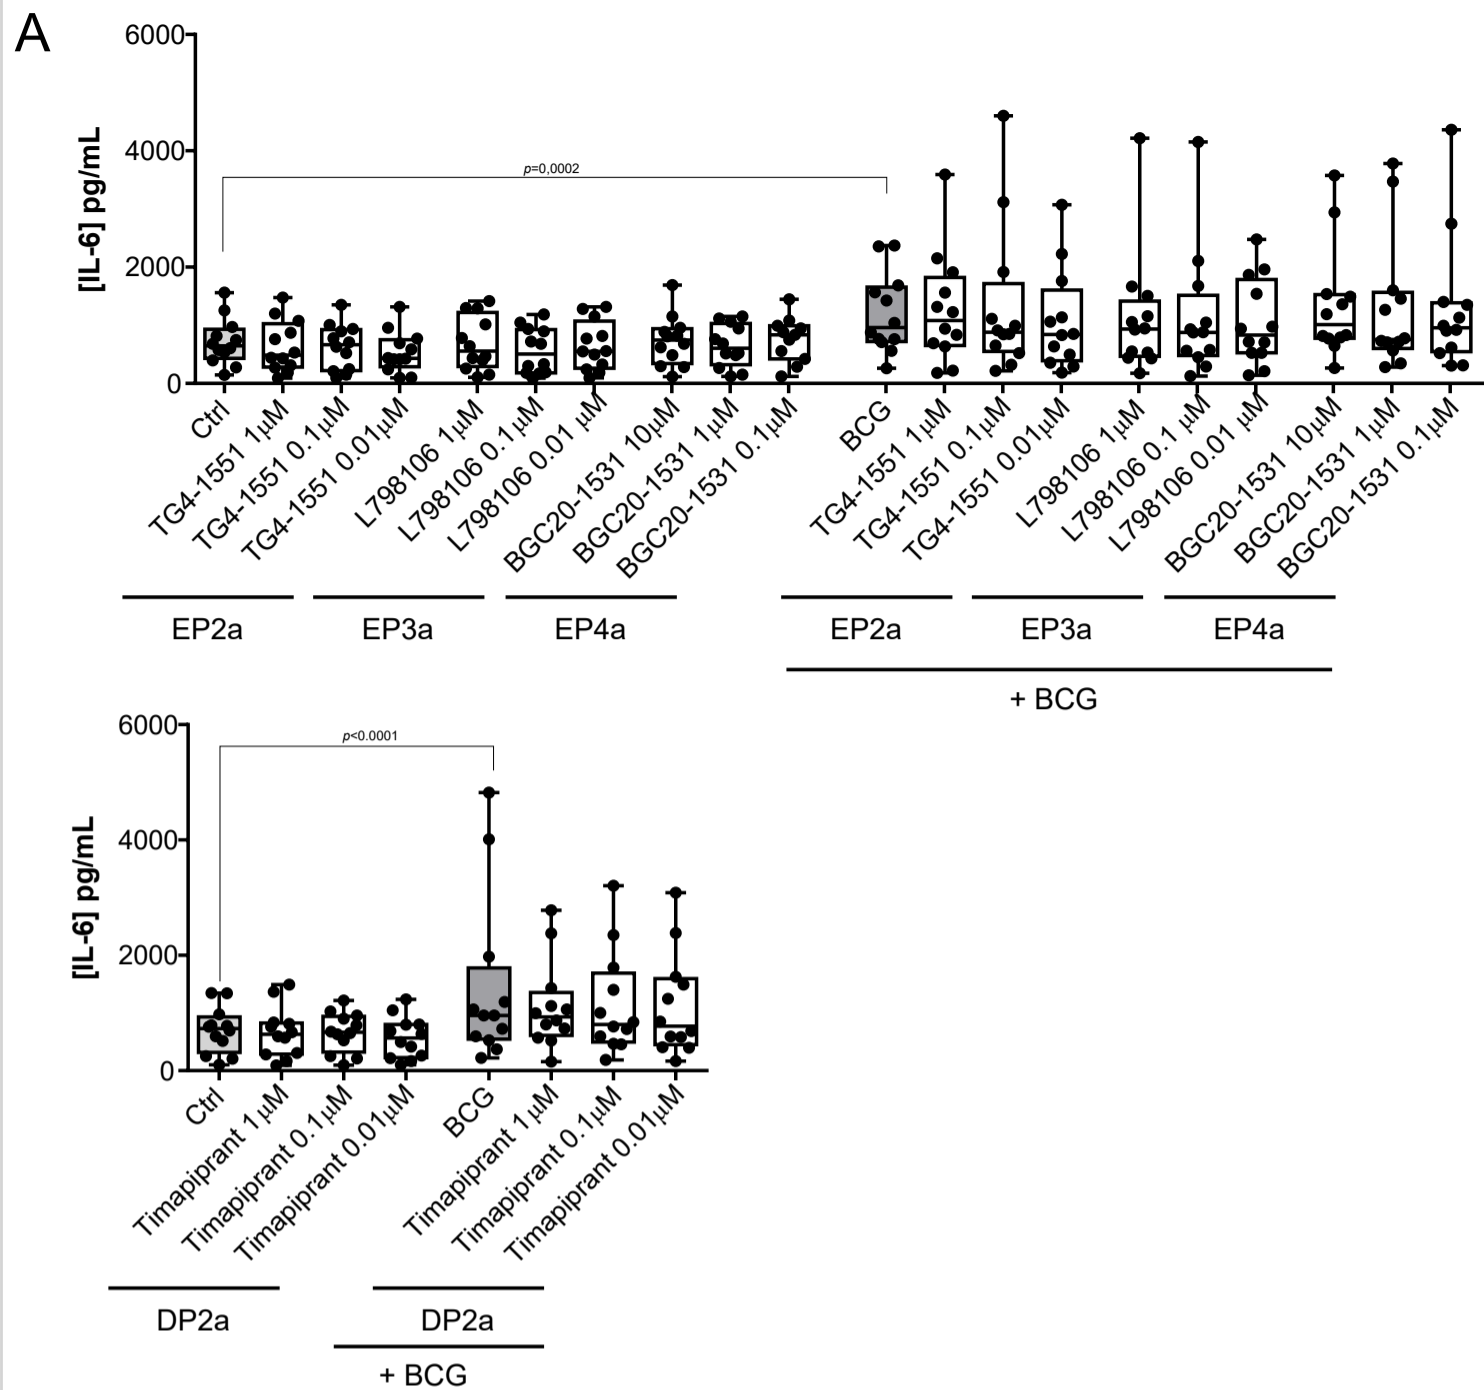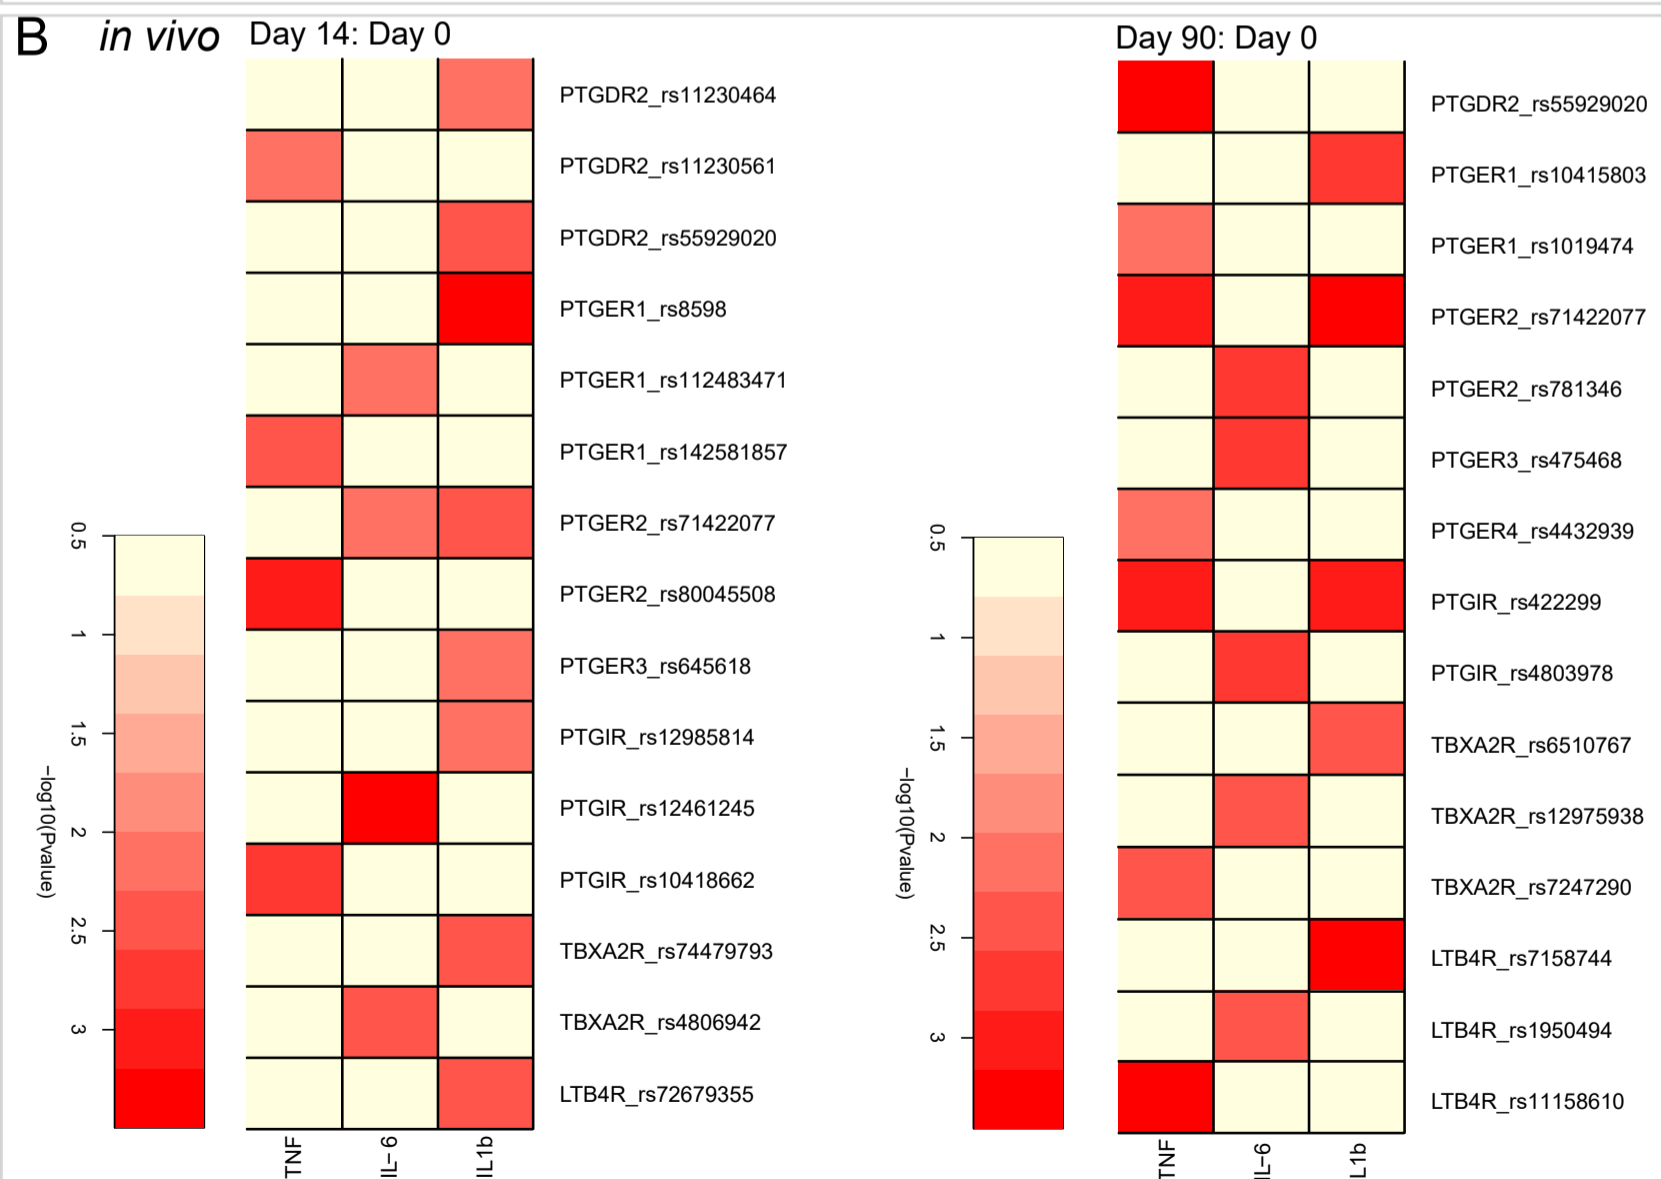

**Figure S5. The role of prostanoids receptors in BCG-induced responsiveness.** (A) IL-6 by BCG-trained macrophages incubated with (1, 0.1, 0.01  $\mu$ M) TG4-155, (1, 0.1, 0.01  $\mu$ M) L798106, (10, 1, 0.1  $\mu$ M) BGC20-1531 or (1, 0.1, 0.01  $\mu$ M) Timapiprant for the first 24 h and restimulated with LPS for another 24 h at day 6 of culture. (n=12 biologic replicates, pooled from 4 independent experiments). Mean, 10-90 percentile and whiskers extend to the most extreme points, two-way ANOVA, Sidak's multiple comparisons test. (B) Heatmaps of the p values of the association between SNPs around *PTGDR2*, *PTGER1*, *PTGER2*, *PTGER3*, *PTGER4*, *PTGIR*, *TBXA2R*, *LTB4R* (+/- 250kb) and the fold change of the production of TNF $\alpha$ , IL-6 and IL-1 $\beta$  upon BCG vaccination and *S. aureus* *ex vivo* restimulation, 14 days after vaccination (left panel) and 90 days after vaccination (right panel) (n= 278 healthy volunteers).

**A**  
*in vivo*

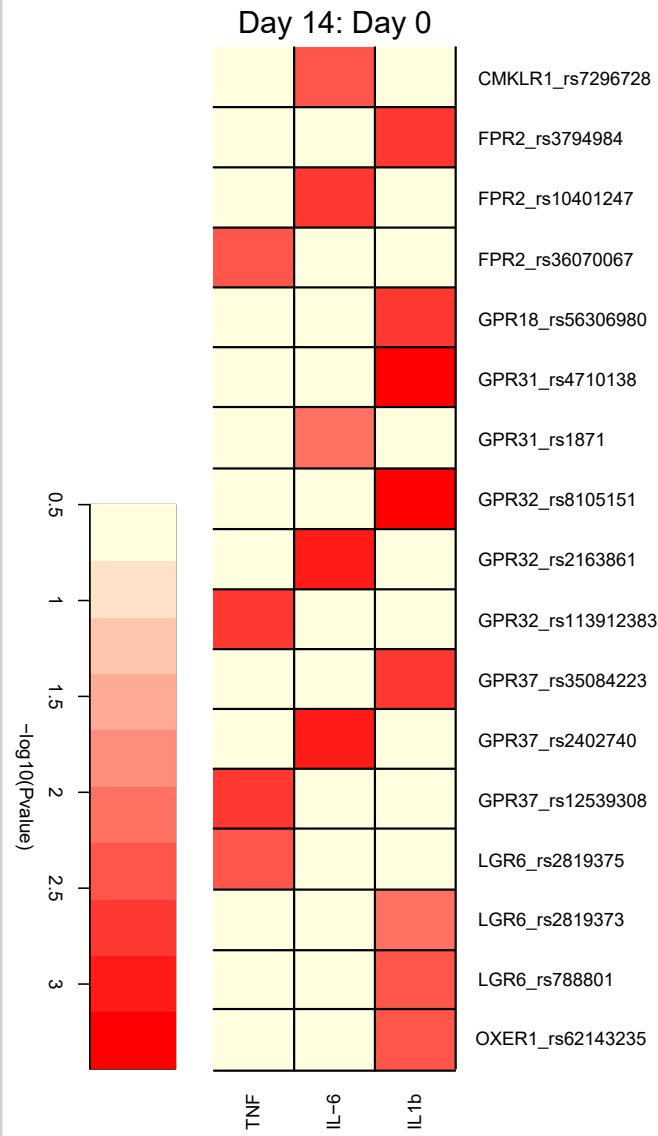

**B**  
*in vivo*

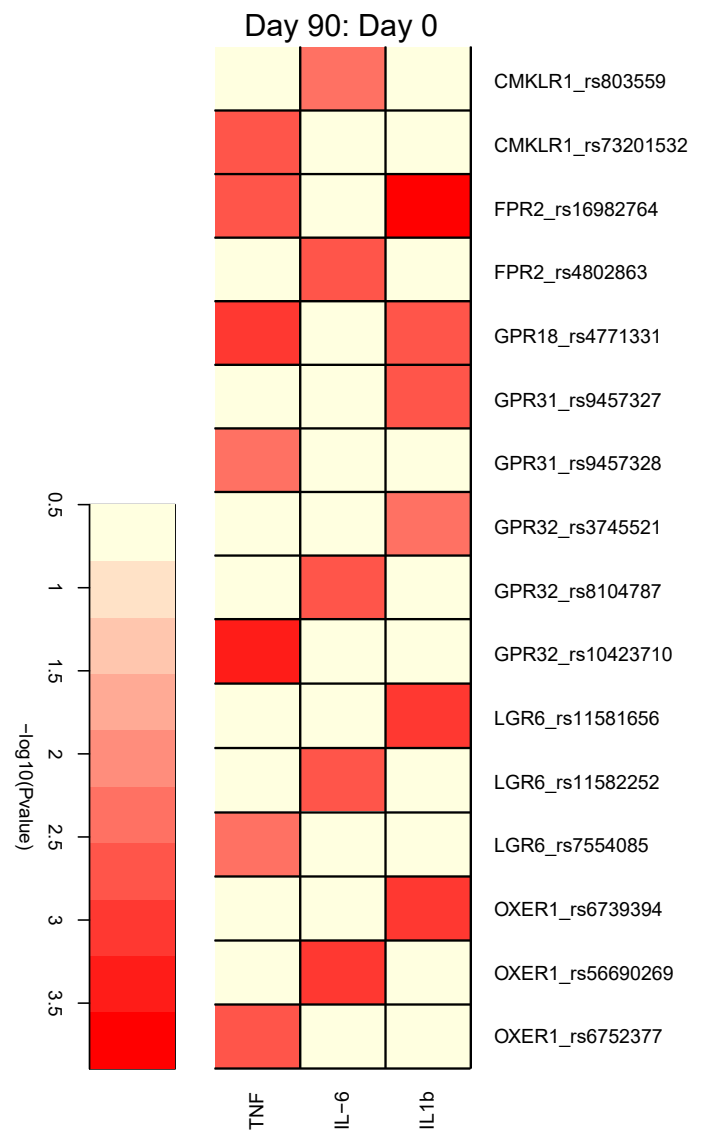

**Figure S6. The role of oxylipins receptors in BCG-induced responsiveness.** Heatmaps of the p values of the association between SNPs around *CMKLR1*, *FPR1*, *GPR18*, *GPR31*, *GPR32*, *GPR37*, *LGR6*, *OXER1* (+/- 250kb) and the fold change of the production of TNF $\alpha$ , IL-6 and IL-1 $\beta$  upon BCG vaccination and *S. aureus ex vivo* restimulation, 14 days after vaccination (left panel) and 90 days after vaccination (right panel) (n= 278 healthy volunteers).

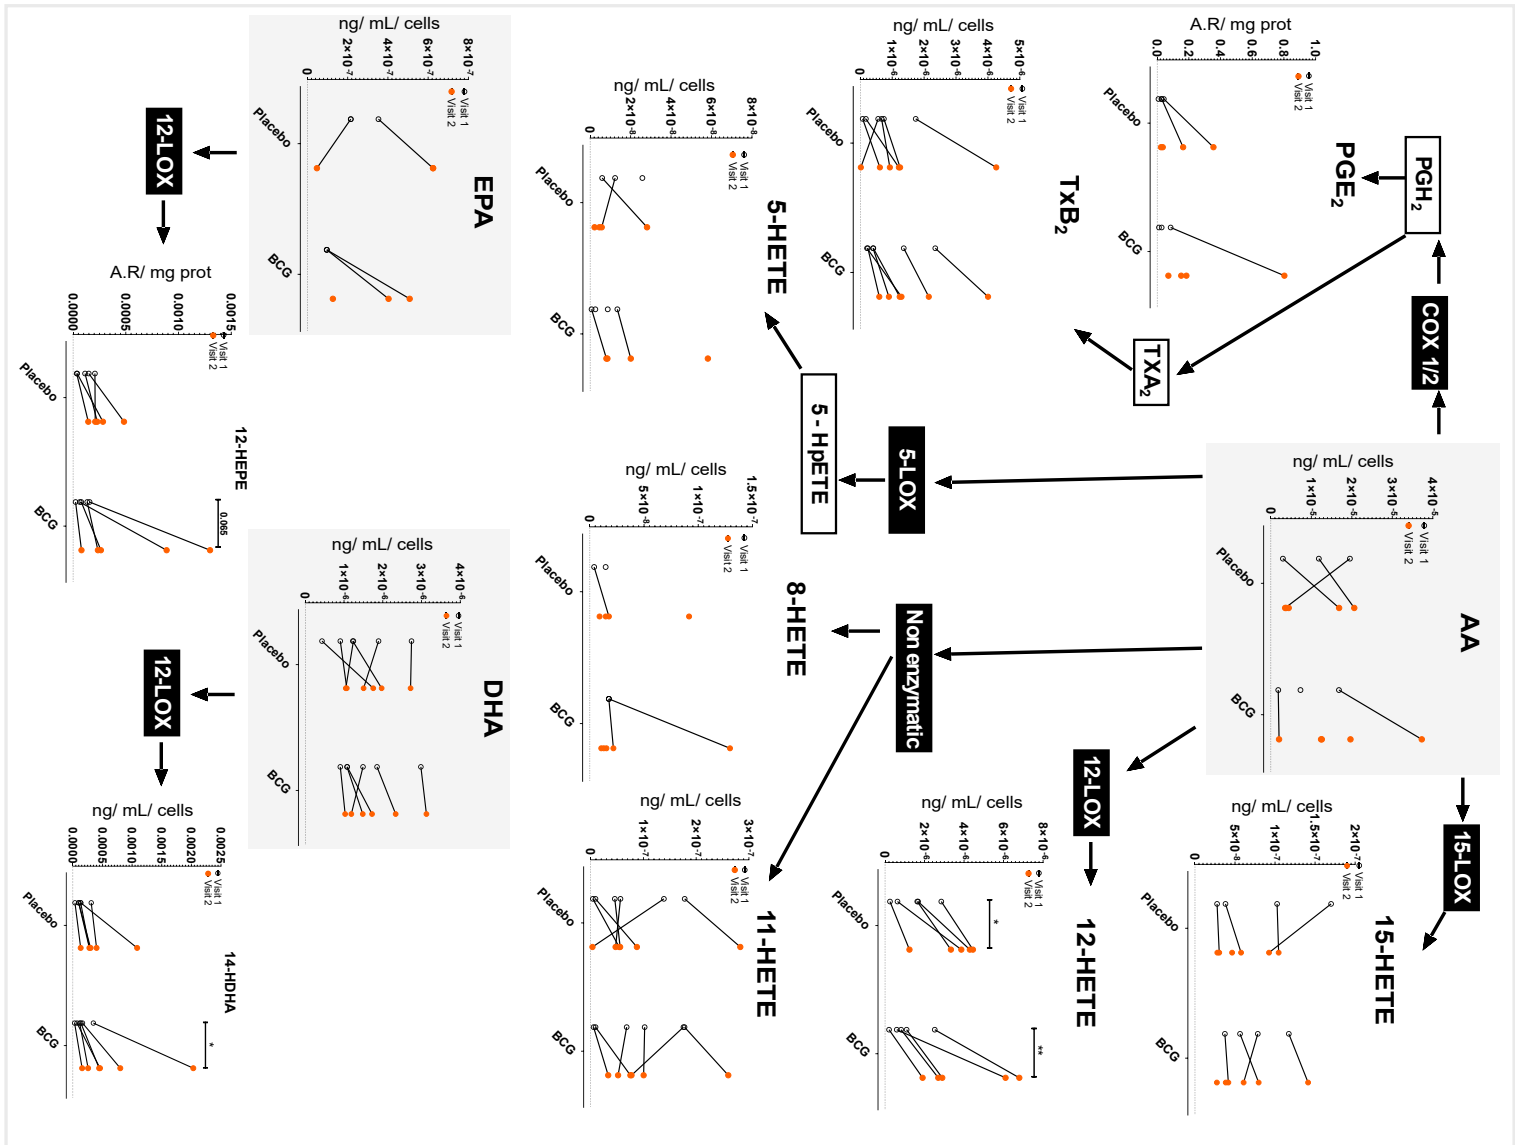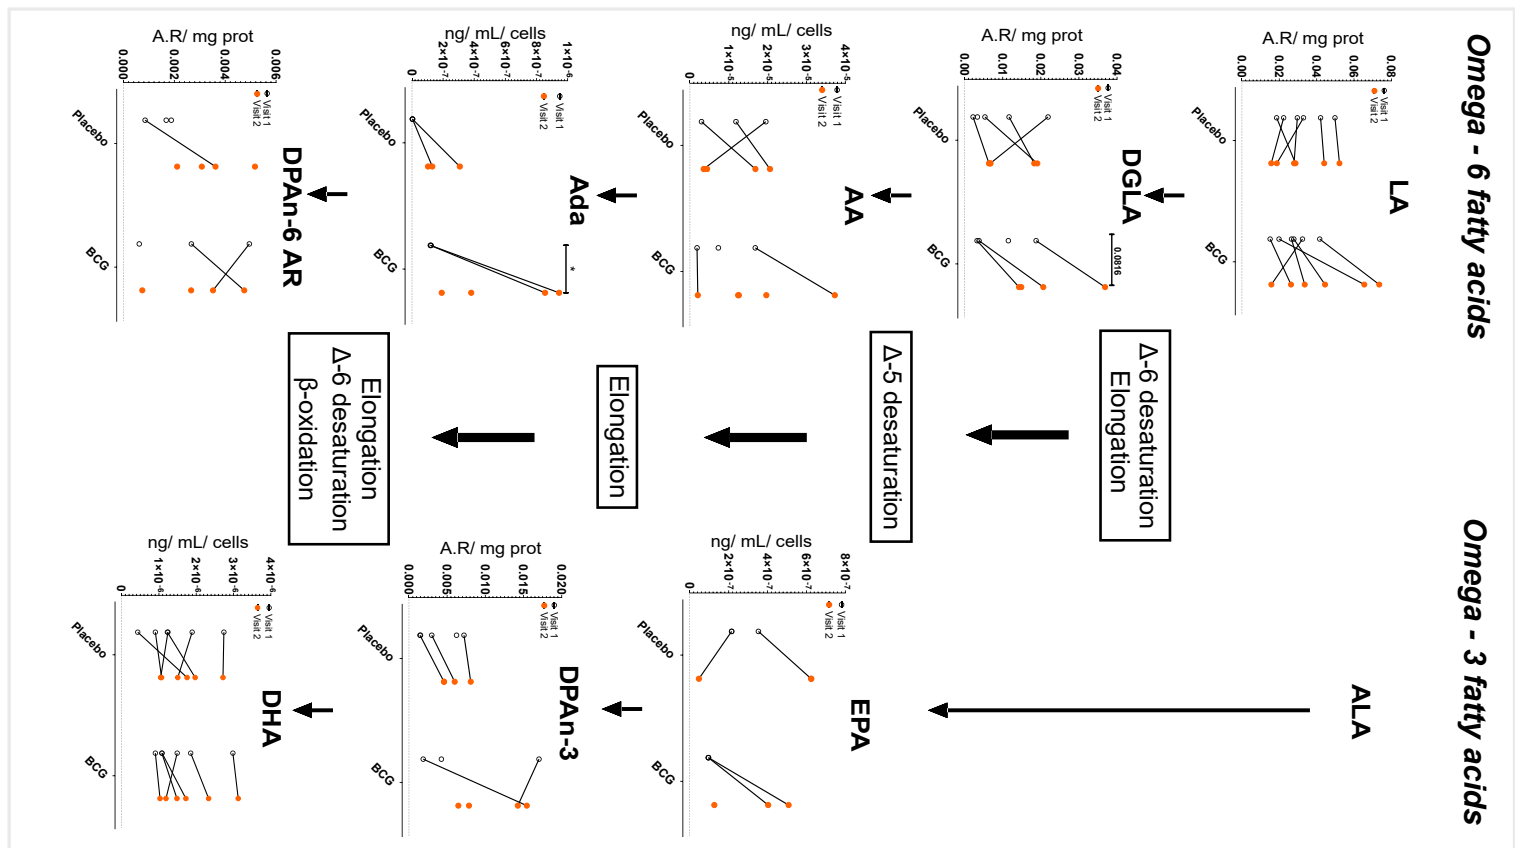

**Figure S7.** Concentrations (ng/mL) corrected to cell number or Area ratio (A.R) corrected to protein content of PUFA and oxylipids of *in vivo* BCG-trained response in monocytes (n=6 biological replicates), \* p ≤ 0.05, \*\* p ≤ 0.01, two-way ANOVA, Sidak's multiple comparisons test. Data points below the technical limit of detection are not shown. One outlier per group was removed (ROUT test (Q=5%).



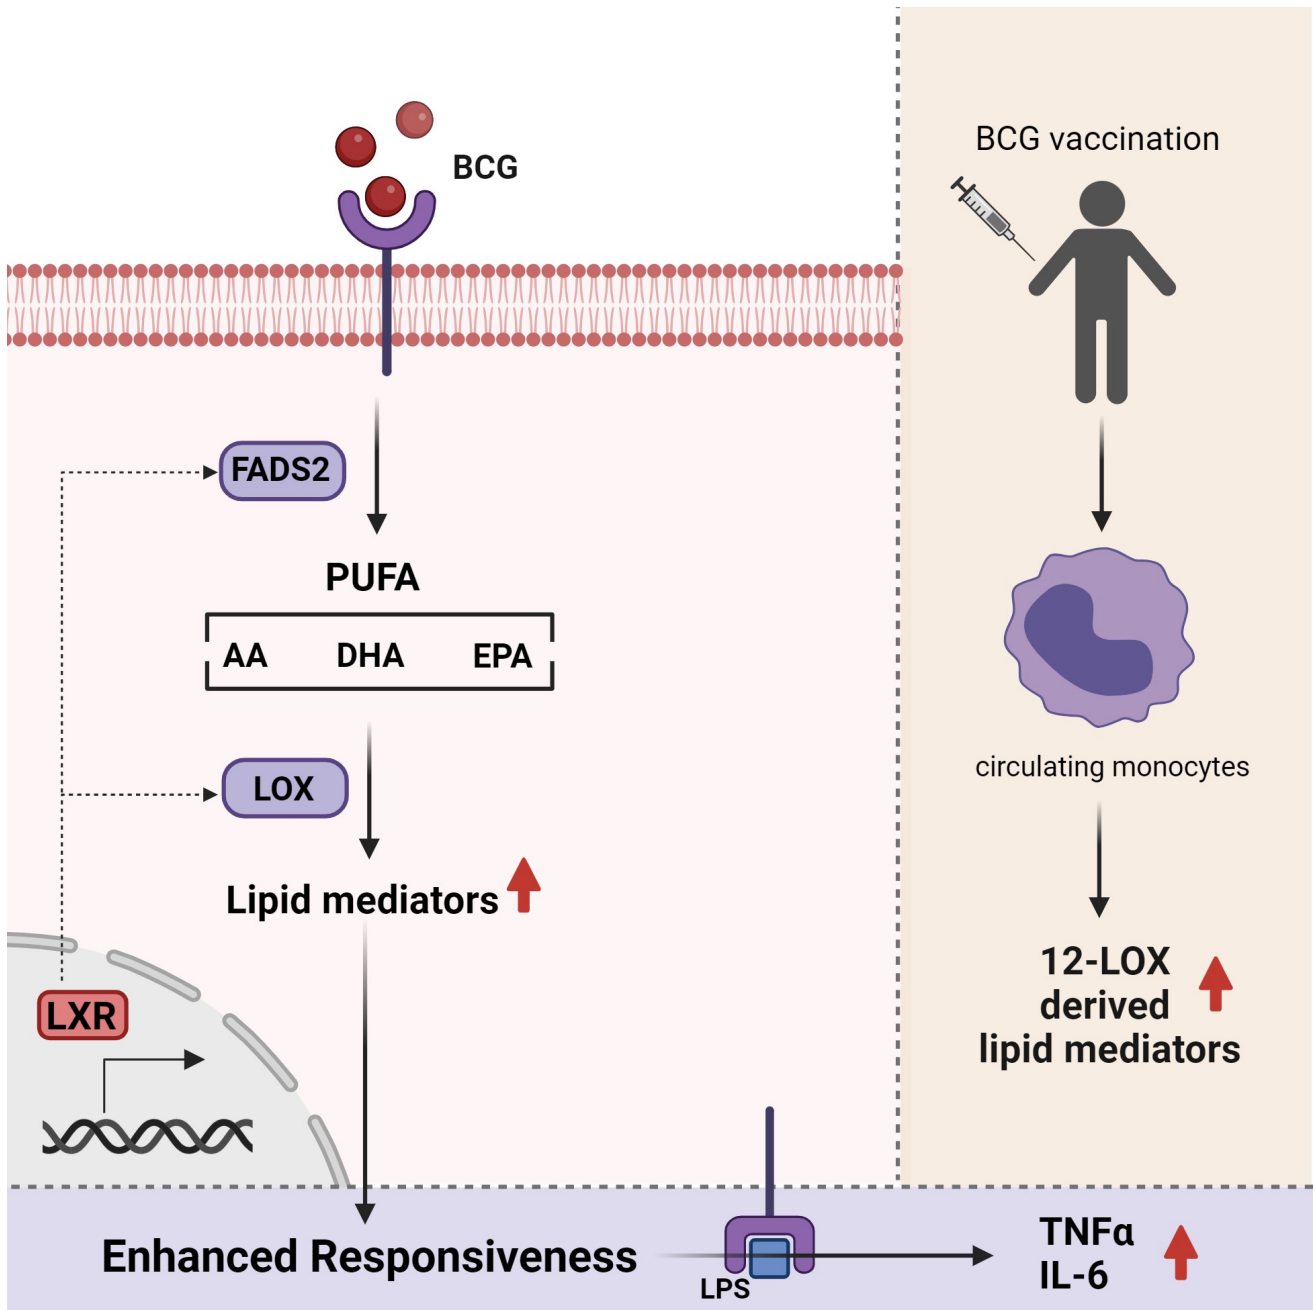

Figure S8. Graphical representation of the key findings of this manuscript. Created with BioRender.com
